# Supplementary material
Source: HighWire-hosted journal article supplement (http://www.ghspjournal.org/highwire/filestream/1584/field_highwire_adjunct_files/0/15-00056-Munroe-Supplementary-material.pdf)
Supplement: 15-00056-Munroe-Supplementary-material.pdf [file 15-00056-Munroe-Supplementary-material.pdf]

**Supplementary Figure 1.** Annual Number of Family Planning Clients Served by Marie Stopes International Social Franchising Programs in Selected African and Asian Countries, by Method, 2008–2014

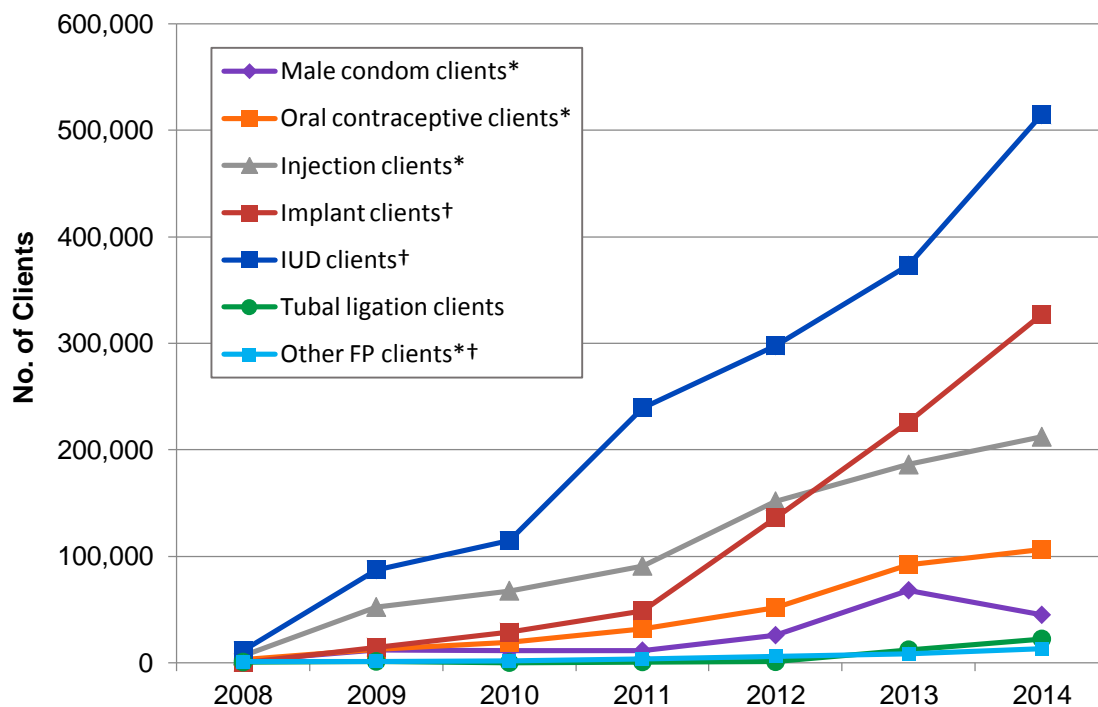

Data are from routine program monitoring, from 7 countries in 2008 and growing to 17 countries in 2014.

\* The number of clients receiving short-acting contraceptive methods was estimated by dividing the number of commodities provided by the number needed for a full year of contraceptive protection (i.e., 13 for oral contraceptive pill, 98 for condoms, 4 for DMPA contraceptive injections; these factors differ slightly from couple-years of protection [CYP] conversion factors because CYP conversion factors take into account method effectiveness and wastage).

† The number of clients receiving long-acting methods was estimated as the number of IUD and implant insertion services provided.

Munroe E, Hayes B, Taft J. Private-sector social franchising to accelerate family planning access, choice, and quality: results from Marie Stopes International. *Glob Health Sci Pract.* 2015. <http://dx.doi.org/10.9745/GHSP-D-15-00056> (Supplementary material)

**Supplementary Table 1.** Comparison of Age of MSI Social Franchise Clients in 2013 (N=4,844) With National Age and Family Planning Usage Figures

| <b>Country</b> | <b>% of MWRA aged 15–24</b> | <b>% of FP demand from MWRA aged 15–24</b> | <b>% of modern FP users aged 15–24</b> | <b>% of MSI SF clients aged 15–24 (95% CI)</b> |
|----------------|-----------------------------|--------------------------------------------|----------------------------------------|------------------------------------------------|
| Ethiopia       | 24.2                        | 25.8                                       | 27.2                                   | 39.1 (27.4, 50.8)                              |
| Ghana          | 11.7                        | 19.6                                       | 16.4                                   | 31.9 (24.3, 39.5)                              |
| India          | 25.3                        | 18.4                                       | 10.7                                   | 13.6 (8.2, 19.0)                               |
| Kenya          | 23.7                        | 21.1                                       | 17.1                                   | 30.4 (16.9, 43.9)                              |
| Madagascar     | 24.3                        | 25.5                                       | 22.4                                   | 35.1 (21.5, 48.7)                              |
| Malawi         | 29.2                        | 26.7                                       | 24.8                                   | 31.3 (23.4, 39.2)                              |
| Mali           | 30.2                        | 24.5                                       | 23.9                                   | 42.9 (36.3, 49.5)                              |
| Nigeria        | 23.5                        | 17.1                                       | 10.9                                   | 13.9 (9.5, 18.3)                               |
| Pakistan       | 20.0                        | 14.1                                       | 10.3                                   | 11.0 (9.7, 12.3)                               |
| Philippines    | 8.4                         | 15.3                                       | 13.0                                   | 29.2 (15.6, 42.8)                              |
| Senegal        | 26.5                        | 23.9                                       | 16.3                                   | 21.2 (14.8, 27.6)                              |
| Sierra Leone   | 20.1                        | 20.0                                       | 15.9                                   | 38.9 (28.8, 49.0)                              |
| Uganda         | 22.5                        | 23.7                                       | 19.7                                   | 41.4 (25.5, 57.3)                              |
| Vietnam        | 11.3                        | 8.6                                        | 8.2                                    | 8.6 (5.4, 11.8)                                |
| <b>Overall</b> |                             |                                            |                                        | 26.1 (23.8, 28.4)                              |

Abbreviations: FP, family planning; MSI, Marie Stopes International; MWRA, married women of reproductive age; SF, social franchising.

Source: 2013 client exit interviews with MSI clients; national figures from most recent Demographic and Health survey in each country.

Munroe E, Hayes B, Taft J. Private-sector social franchising to accelerate family planning access, choice, and quality: results from Marie Stopes International. *Glob Health Sci Pract.* 2015. <http://dx.doi.org/10.9745/GHSP-D-15-00056> (Supplementary material)

**Supplementary Table 2.** Comparison of the Poverty Levels of MSI Social Franchise Clients in 2013 (N=4,844) With National Poverty Figures

| Country        | % of population living on <US\$1.25/day | % of MSI clients living on <\$1.25/day (95% CI) | % of population living on <\$2.50/day | % of MSI clients living on <\$2.50/day (95% CI) |
|----------------|-----------------------------------------|-------------------------------------------------|---------------------------------------|-------------------------------------------------|
| Ethiopia       | 31                                      | 17.4 (14.5, 20.3)                               | 84                                    | 65.9 (61.4, 70.3)                               |
| Ghana          | 29                                      | 2.1 (0.6, 3.6)                                  | 64                                    | 11.8 (6.8, 16.9)                                |
| India          | 33                                      | 16.0 (13.2, 18.9)                               | 74                                    | 71.3 (67.5, 75.1)                               |
| Kenya          | 43                                      | 5.8 (3.5, 8.1)                                  | 76                                    | 28.7 (22.2, 35.3)                               |
| Madagascar     | 67                                      | 35.7 (18.7, 52.8)                               |                                       |                                                 |
| Malawi         | 62                                      | 29.7 (23.6, 35.7)                               | 92                                    | 70.3 (65.0, 75.5)                               |
| Mali           | 50                                      | 39.6 (32.3, 46.8)                               | 87                                    | 78.9 (74.2, 83.6)                               |
| Nigeria        | 54                                      | 17.4 (16.1, 18.7)                               |                                       |                                                 |
| Pakistan       | 21                                      | 15.9 (14.3, 17.4)                               | 69                                    | 74.8 (72.7, 77.0)                               |
| Philippines    | 18                                      | 14.5 (9.8, 19.1)                                | 53                                    | 47.0 (38.3, 55.7)                               |
| Senegal        | 30                                      | 6.4 (5.2, 7.7)                                  | 72                                    | 42.2 (39.0, 45.4)                               |
| Sierra Leone   | 52                                      | 32.2 (25.2, 39.1)                               | 89                                    | 73.9 (66.6, 81.1)                               |
| Uganda         | 38                                      | 22.7 (16.9, 28.4)                               | 73                                    | 61.3 (53.7, 68.8)                               |
| Vietnam        | 17                                      | 4.9 (3.3, 6.6)                                  | 22                                    | 41.5 (35.4, 47.5)                               |
| <b>Overall</b> | 17 <sup>†</sup>                         | 15.1 (13.8, 16.4)*                              | 46 <sup>†</sup>                       | 57.4 (54.9, 60.0)*                              |

\* Overall measure excludes Madagascar and Nigeria.

† For the overall comparison, the % of population living on less than \$1.25 and \$2.50 per day is of all low- and middle-income countries in the world.

Source: 2013 client exit interviews with MSI clients (excluding Madagascar and Nigeria as different measures of poverty were used); national poverty figures from UNICEF and the World Bank.

Munroe E, Hayes B, Taft J. Private-sector social franchising to accelerate family planning access, choice, and quality: results from Marie Stopes International. *Glob Health Sci Pract.* 2015. <http://dx.doi.org/10.9745/GHSP-D-15-00056> (Supplementary material)

**Supplementary Table 3.** MSI Social Franchise Clients in 2013 (N=4,844) Who Were New Adopters of Family Planning\* by Country and Proportion Choosing LARCs and Permanent Methods

| Country        | MSI Clients Who Are<br>FP Adopters |            | FP Adopters Choosing<br>LARCs/PMs |            |
|----------------|------------------------------------|------------|-----------------------------------|------------|
|                | %                                  | 95% CI     | %                                 | 95% CI     |
| Ethiopia       | 52.2                               | 31.4, 73.0 | 17.4                              | 4.0, 30.8  |
| Ghana          | 8.3                                | 3.7, 12.9  | 58.3                              | 30.4, 86.2 |
| India          | 61.0                               | 53.3, 68.7 | 78.7                              | 70.4, 87.0 |
| Kenya          | 27.4                               | 5.6, 49.2  | 40.5                              | 0.0, 95.0  |
| Madagascar     | 22.1                               | 7.4, 36.8  | 58.8                              | 22.6, 95.0 |
| Malawi         | 31.3                               | 22.4, 40.2 | 28.6                              | 9.2, 48.0  |
| Mali           | 71.7                               | 65.7, 77.7 | 94.9                              | 91.5, 98.3 |
| Nigeria        | 64.3                               | 58.2, 70.4 | 87.6                              | 82.4, 92.8 |
| Pakistan       | 44.1                               | 41.1, 47.1 | 57.8                              | 54.0, 61.6 |
| Philippines    | 58.4                               | 39.3, 77.5 | 24.4                              | 7.0, 41.8  |
| Senegal        | 16.0                               | 10.2, 21.8 | 56.0                              | 36.5, 75.5 |
| Sierra Leone   | 13.9                               | 7.4, 20.4  | 46.7                              | 21.5, 71.9 |
| Uganda         | 38.4                               | 24.8, 52.0 | 63.7                              | 39.5, 87.9 |
| Vietnam        | 32.6                               | 22.5, 42.7 | 52.6                              | 45.0, 60.2 |
| <b>Overall</b> | 40.7                               | 37.4, 44.0 | 47.8                              | 43.4, 52.2 |

\* New adopters are clients who were not using any contraceptive method in the 3 months prior to their visit.

Abbreviations: FP, family planning; LARCs, long-acting reversible contraception; MSI, Marie Stopes International.

Source: 2013 client exit interviews with MSI clients.
